# Supplementary material for: Factors associated with knowledge, attitude, and practice of COVID-19 among health care professional’s working in South Wollo Zone Hospitals, Northeast Ethiopia
Source: PubMed Central journal article supplement — SAGE Open Med. 2021 Jun 12;9:20503121211025147. doi: 10.1177/20503121211025147 (PMC8202332; doi:10.1177/20503121211025147), 2021-06-12
Supplement: sj-pdf-1-smo-10.1177_20503121211025147.pdf [file sj-pdf-1-smo-10.1177_20503121211025147.pdf]

**Annex III: Consent Form**

**Address of the principal investigator: Mequannent Sharew**

Cell phone: 0940235169, E-mail: [mequsharew8@gmail.com](mailto:mequsharew8@gmail.com)

In undersigning this document, I am giving my consent to participate in the study entitled as “Healthcare professional’s knowledge, attitude and practice towards corona virus disease at Dessie Referral Hospital, Northeast Ethiopia” I have been informed that the purpose of this study is to assess Healthcare professional’s knowledge, attitude and practice towards corona virus disease at Dessie Referral Hospital, Northeast Ethiopia .I have understood that involvement of in this study is completely voluntarily. I have been told that my answers to the questions will not be given to anyone else and no reports of this study ever identify me in any way. I have also been informed that my participation or non-participation or my refusal to answer questions will have no effect on me. I understood that participation in this study does not involve risks. I understood that Mequannent Sharew is the contact person if I have questions about the study or about my rights as a study participant.

Are you satisfied with the information provided so far?

- 1. Yes..... Continue to the next page
- 2. No ..... I won’t participate

Participant \_\_\_\_\_ Signature\_\_\_\_\_ Date\_\_\_\_\_

Researcher /witness \_\_\_\_\_ Signature\_\_\_\_\_ Date\_\_\_\_\_

**Thank you!**

## Annex VI: questionnaire English version

### Part I: Socio -demographic and economic characteristics

| Code | Variables                                 | Categories (encircle the answer)                                                                                  | Remark |
|------|-------------------------------------------|-------------------------------------------------------------------------------------------------------------------|--------|
| Q101 | Age                                       | _____ years                                                                                                       |        |
| Q102 | Sex                                       | 1) Male 2) Female                                                                                                 |        |
| Q103 | Marital status                            | 1)Married 2) Single 3) Divorced<br>4) Widowed                                                                     |        |
| Q104 | Educational status                        | 1) diploma 2) degree 3) post graduate                                                                             |        |
| Q105 | Religion                                  | 1) orthodox 2) Protestant 3) Muslim                                                                               |        |
| Q106 | Income/month                              | _____Birr                                                                                                         |        |
| Q107 | Profession                                | 1)Nurse 2) medical doctor 3) pharmacist<br>4) midwifery 5) laboratory professional 6)<br>others                   |        |
| Q108 | Source of information regarding COVID -19 | 1)social media 2) radio and television 3)<br>newspaper 4) seniors and other colleagues 5)<br>seminar and workshop |        |

### Part-II: - Knowledge questions – encircle the answer

|      |                                                                   | Yes (1) | Not (2) | I don't know (3) |
|------|-------------------------------------------------------------------|---------|---------|------------------|
| Q209 | COVID-19 is a viral infection?                                    | 1       | 2       | 3                |
| Q210 | Influenza vaccine also gives protection from COVID-19?            | 1       | 2       | 3                |
| Q211 | COVID-19 patients develop severe acute respiratory illness?       | 1       | 2       | 3                |
| Q212 | Fever, cough and shortness of breath are symptoms of the COVID-19 | 1       | 2       | 3                |

|      |                                                                                                                                                                       |   |   |   |
|------|-----------------------------------------------------------------------------------------------------------------------------------------------------------------------|---|---|---|
| Q213 | Antibiotics are first line treatment                                                                                                                                  | 1 | 2 | 3 |
| Q214 | Incubation period for the COVID-19 is 2-14 days?                                                                                                                      | 1 | 2 | 3 |
| Q215 | Coronavirus infection could be fatal?                                                                                                                                 | 1 | 2 | 3 |
| Q216 | Eating or contacting wild animals would result in the infection by the COVID-19 virus?                                                                                | 1 | 2 | 3 |
| Q217 | The COVID-19 virus spreads via respiratory droplets of infected individuals?                                                                                          | 1 | 2 | 3 |
| Q218 | It is not necessary for children and young adults to take measures to prevent the infection by the COVID-19 virus?                                                    | 1 | 2 | 3 |
| Q219 | To prevent the infection by COVID-19, individuals should avoid going to crowded places such as train stations and avoid taking public transportations?                | 1 | 2 | 3 |
| Q220 | Isolation and treatment of people who are infected with the COVID-19 virus are effective ways to reduce the spread of the virus?                                      | 1 | 2 | 3 |
| Q221 | People who have contact with someone infected with the COVID-19 virus should be immediately isolated in a proper place. In general, the observation period is 14 day? | 1 | 2 | 3 |
| Q222 | Not all persons with COVID-2019 will develop to severe cases. Only those who are elderly, have chronic illnesses, and are obese are more likely to be severe cases?   | 1 | 2 | 3 |

**Part-III: - Attitude questions Str.** Disagree= 1, Disagree =2, Neutral=3, Agree=4, St. Agree=5

|      |                                                                                         |   |   |   |   |   |
|------|-----------------------------------------------------------------------------------------|---|---|---|---|---|
| Q323 | Healthcare workers must acknowledge themselves with all the information about COVID-19? | 1 | 2 | 3 | 4 | 5 |
|------|-----------------------------------------------------------------------------------------|---|---|---|---|---|

|      |                                                                                                                                |   |   |   |   |   |
|------|--------------------------------------------------------------------------------------------------------------------------------|---|---|---|---|---|
| Q333 | Transmission of COVID-19 infection can be prevented by using universal precautions given by WHO, CDC?                          | 1 | 2 | 3 | 4 | 5 |
| Q334 | Prevalence of COVID-19 can be reduced by active participation of healthcare workers in the hospital infection control program? | 1 | 2 | 3 | 4 |   |
| Q335 | Intensive and Emergency treatment should be given to diagnosed patients.                                                       | 1 | 2 | 3 | 4 |   |
| Q336 | COVID-19 patients should be kept in isolation?                                                                                 | 1 | 2 | 3 | 4 |   |
| Q337 | Gowns, gloves, mask and goggles must be used when dealing with COVID-19 patients?                                              | 1 | 2 | 3 | 4 |   |

**Part-II: - Practice questions – encircle the answer 1=Yes 2=No 3=Some times**

|      |                                                                            | Yes (1) | Not (2) | Sometimes (3) |
|------|----------------------------------------------------------------------------|---------|---------|---------------|
| Q438 | Do you educate your patient about the disease?                             | 1       | 2       | 3             |
| Q439 | Do you use face mask in crowds?                                            | 1       | 2       | 3             |
| Q440 | Do you avoid touching your eyes, nose or mouth as far as you can?          | 1       | 2       | 3             |
| Q441 | Do you throw the used tissue in the trash?                                 | 1       | 2       | 3             |
| Q442 | Do you cover your nose and mouth with a tissue during sneezing or coughing | 1       | 2       | 3             |
| Q443 | Do you use soap or hand sanitizer to wash your hands continuously?         | 1       | 2       | 3             |
